# Supplementary material for: The Relationship of Fat Distribution and Insulin Resistance with Lumbar Spine Bone Mass in Women
Source: PubMed Central journal article supplement (PMC4466243; doi:10.1371/journal.pone.0129764), 2015-06-11
Supplement: pone.0129764.s001.pdf [file pone.0129764.s001.pdf]

Table S1- Raw data: clinical characteristics, biochemical assessment, bone mineral density (BMD), bone marrow adipose tissue (BMAT), visceral adipose tissue (VAT), HOMA-IR and intrahepatic lipids (IHL)

|    | Age | Height | Weight | BMI  | Glucose | HbA1c | BMD   | BMAT | VAT   | Insulin | HOMA-IR | IHL  |
|----|-----|--------|--------|------|---------|-------|-------|------|-------|---------|---------|------|
| 1  | 21  | 1.792  | 65.7   | 20.5 | 85      | 5.5   | 1.081 | 20.8 | 707   | 7.0     | 1.47    | 1.34 |
| 2  | 22  | 1.69   | 58.7   | 20.6 | 83      | 5.5   | 0.937 | 9.6  | 494   | 9.5     | 1.94    | 1.74 |
| 3  | 23  | 1.565  | 42.8   | 17.5 | 87      | 4.6   | 0.853 | 26.8 | 668   | 7.0     | 1.50    | 0.95 |
| 4  | 28  | 1.52   | 49.4   | 21.4 | 82      | 5.1   | 0.888 | 10.9 | 740   | 4.0     | 0.81    | 2.77 |
| 5  | 28  | 1.62   | 63.0   | 24.0 | 78      | 5.3   | 1.257 | 11.5 | 3986  | 14.0    | 2.69    | 1.22 |
| 6  | 29  | 1.63   | 48.8   | 18.3 | 96      | 4.9   | 0.935 | 15.6 | 433   | 9.2     | 2.18    | 0.65 |
| 7  | 30  | 1.75   | 61.0   | 19.9 | 73      | 5.0   | 0.937 | 27.6 | 960   | 4.8     | 0.86    | 0.93 |
| 8  | 35  | 1.60   | 77.6   | 30.4 | 85      | 5.4   | 1.050 | 22.7 | 9300  | 20.0    | 4.19    | 5.84 |
| 9  | 36  | 1.8    | 64.7   | 20.0 | 92      | 5.6   | 0.964 | 20.4 | 973   | 8.0     | 1.82    | 1.12 |
| 10 | 39  | 1.65   | 71.3   | 26.3 | 83      | 5.4   | 1.04  | 18.7 | 7483  | 3.8     | 0.79    | 0.87 |
| 11 | 41  | 1.61   | 66.3   | 25.5 | 95      | 4.9   | 1.044 | 17.7 | 4808  | 15.0    | 3.52    | 3.37 |
| 12 | 47  | 1.61   | 64.3   | 24.8 | 90      | 5.1   | 0.962 | 30.2 | 1973  | 8.0     | 1.78    | 1.72 |
| 13 | 47  | 1.50   | 65.9   | 28.8 | 92      | 5.1   | 0.858 | 39.4 | 8417  | 14.0    | 3.18    | 1.49 |
| 14 | 48  | 1.78   | 73.9   | 23.3 | 84      | 5.5   | 1.108 | 32.0 | 2378  | 4.0     | 0.83    | 1.00 |
| 15 | 49  | 1.60   | 66.2   | 25.8 | 90      | 5.6   | 0.989 | 26.7 | 5506  | 7.5     | 1.67    | 3.26 |
| 16 | 54  | 1.65   | 62.8   | 23.0 | 85      | 5.6   | 0.959 | 34.1 | 2448  | 4.0     | 0.84    | 0.87 |
| 17 | 54  | 1.72   | 97.8   | 33.0 | 105     | 6.1   | 1.165 | 34.7 | 12855 | 6.0     | 1.55    | 6.87 |
| 18 | 56  | 1.67   | 57.8   | 20.7 | 98      | 5.5   | 0.742 | 47.3 | 12108 | 9.0     | 2.18    | 0.75 |
| 19 | 56  | 1.51   | 64.3   | 28.2 | 93      | 5.1   | 0.863 | 36.2 | 12748 | 5.0     | 1.15    | 3.20 |
| 20 | 57  | 1.70   | 71.6   | 24.7 | 90      | 6.4   | 0.979 | 31.0 | 1728  | 6.0     | 1.33    | 0.56 |
| 21 | 57  | 1.72   | 74.0   | 25.0 | 96      | 6.3   | 0.970 | 52.3 | 4859  | 9.0     | 2.13    | 1.13 |
| 22 | 59  | 1.55   | 60.2   | 25.0 | 89      | 5.1   | 1.084 | 23.6 | 5328  | 4.0     | 0.88    | 1.37 |
| 23 | 59  | 1.58   | 84.5   | 33.6 | 89      | 5.5   | 0.961 | 33.3 | 12664 | -       | -       | 19.9 |
| 24 | 59  | 1.46   | 75.6   | 35.4 | 84      | 5.8   | 0.895 | 28.4 | 11418 | 13.0    | 2.69    | 2.43 |
| 25 | 59  | 1.58   | 93.3   | 37.3 | 91      | 5.7   | 0.869 | 18.7 | 8764  | 14.0    | 3.14    | 4.43 |
| 26 | 62  | 1.66   | 62.0   | 22.5 | 93      | 6.1   | 0.940 | 49.5 | 4699  | 7.0     | 1.61    | 5.30 |
| 27 | 62  | 1.55   | 64.0   | 26.5 | 81      | 5.8   | 0.993 | 33.5 | 16553 | 28.0    | 5.59    | 4.17 |
| 28 | 64  | 1.64   | 71.0   | 26.3 | 96      | 5.8   | 0.965 | 36.3 | 2635  | 7.0     | 1.66    | 0.84 |
| 29 | 66  | 1.52   | 57.3   | 24.8 | 92      | 5.4   | 0.784 | 52.4 | 7817  | -       | -       | 8.00 |
| 30 | 67  | 1.54   | 66.8   | 28.1 | 87      | 5.7   | 0.956 | 35.1 | 8698  | -       | -       | 3.00 |
| 31 | 68  | 1.63   | 83.6   | 31.5 | 91      | 6.3   | 1.083 | 31.5 | 5766  | 16.0    | 3.59    | 5.76 |
